# Supplementary material
Source: PubMed Central journal article supplement (PMC4810720)
Supplement: JVI.02278-15_zjv999091332so1.pdf [file JVI.02278-15_zjv999091332so1.pdf]

**Table S1: Env- pseudovirus panel and neutralization titers for 34 Viremic controllers and 33 HIV progressors.**

The plasma from each subject was tested against a standardized panel of 11 clade B Tier 2/3 Env-pseudoviruses. Neutralization was considered positive if the 50% inhibitory dose (ID50) titer against an HIV-1 isolate was >3-fold higher than that observed against a negative control murine leukemia virus (MuLV). Subjects with a HIV-1 antibody neutralization breadth of  $\geq 2$  Tier 2/3 viruses were classified as a "Neutralizer" and subjects that failed to show HIV-1 antibody neutralization of any of the 11 Tier 2/3 viruses were classified as a "Non-Neutralizer".

| Viremic<br>Controllers | Neutralization<br>Status | QH0692<br>.42 | SC422<br>661.8 | PVO<br>.4 | TRO.<br>11 | AC10<br>.0.29 | RHPA<br>4259.7 | THRO4<br>156.18 | REJO4<br>541.67 | TRJO4<br>551.58 | WITO4<br>160.33 | CAAN5<br>342.A2 | MuLV | 3X<br>MuLV | Neutralization<br>breadth |
|------------------------|--------------------------|---------------|----------------|-----------|------------|---------------|----------------|-----------------|-----------------|-----------------|-----------------|-----------------|------|------------|---------------------------|
| 622800                 | Neutralizer              | 225           | 366            | 480       | 1581       | 2116          | 588            | 66              | 328             | 61              | 923             | 307             | 30   | 90         | 9                         |
| 773597                 | Neutralizer              | 150           | 188            | 102       | 471        | 247           | 90             | 21              | 326             | 30              | 345             | 503             | 26   | 78         | 9                         |
| 970489                 | Neutralizer              | 70            | 100            | 325       | 171        | 124           | 148            | 59              | 131             | 44              | 134             | 115             | 32   | 96         | 8                         |
| 270245                 | Neutralizer              | 149           | 47             | 117       | 106        | 72            | 135            | 102             | 102             | 98              | 23              | 165             | 31   | 93         | 8                         |
| 912103                 | Neutralizer              | 65            | 55             | 73        | 189        | 53            | 336            | 34              | 200             | 22              | 85              | 185             | <20  | <60        | 7                         |
| 982640                 | Neutralizer              | 162           | 140            | 260       | 167        | 147           | 180            | 71              | 245             | 44              | 69              | 109             | 47   | 141        | 6                         |
| 508682                 | Neutralizer              | 153           | 38             | 47        | 114        | 153           | 26             | 39              | 202             | 53              | 1293            | 99              | 48   | 144        | 4                         |
| 568125                 | Neutralizer              | 352           | 188            | 105       | 411        | 64            | 118            | 69              | 494             | 129             | 112             | 300             | 105  | 315        | 4                         |
| 615167                 | Neutralizer              | 56            | 92             | 26        | 98         | 56            | 31             | 28              | 67              | 77              | 38              | 26              | <20  | <60        | 4                         |
| 195173                 | Neutralizer              | 38            | 46             | 86        | 226        | 73            | 102            | 22              | 203             | 60              | 60              | 178             | 42   | 126        | 3                         |
| 585670                 | Neutralizer              | 35            | 111            | 92        | 181        | <20           | 21             | 42              | <20             | 52              | 41              | 280             | 32   | 96         | 3                         |
| 958793                 | Neutralizer              | <20           | 27             | <20       | 126        | 64            | 205            | 30              | 35              | 38              | <20             | 48              | <20  | <60        | 3                         |
| 245487                 | Neutralizer              | <20           | <20            | 53        | 275        | 58            | 35             | 250             | <20             | 85              | <20             | <20             | <20  | <60        | 3                         |
| 262833                 | Neutralizer              | 52            | <20            | 463       | 126        | <20           | 48             | 49              | 24              | <20             | <20             | 40              | <20  | <60        | 2                         |
| 264095                 | Non-neutralizer          | <20           | <20            | 27        | 23         | <20           | <20            | 29              | <20             | 33              | 24              | 42              | 35   | 105        | 0                         |
| 337892                 | Non-neutralizer          | 157           | 48             | 78        | 136        | 64            | 137            | 66              | 58              | 39              | 92              | 101             | 71   | 213        | 0                         |
| 388031                 | Non-neutralizer          | 52            | <20            | 72        | 56         | 31            | <20            | 51              | 54              | 66              | 33              | 57              | 58   | 174        | 0                         |
| 470157                 | Non-neutralizer          | 95            | 33             | 69        | 70         | <20           | <20            | 49              | 116             | 40              | 53              | 80              | 52   | 156        | 0                         |
| 550657                 | Non-neutralizer          | 60            | 20             | 59        | 70         | <20           | <20            | 33              | 44              | 51              | 46              | 45              | 44   | 132        | 0                         |
| 606807                 | Non-neutralizer          | 54            | 25             | 37        | 66         | <20           | <20            | 24              | 90              | 35              | <20             | 64              | 51   | 153        | 0                         |
| 707249                 | Non-neutralizer          | 58            | <20            | 28        | 74         | <20           | <20            | 43              | 38              | 24              | <20             | 57              | 41   | 123        | 0                         |
| 917933                 | Non-neutralizer          | 34            | <20            | 38        | 34         | 20            | 40             | 28              | <20             | 40              | 31              | 45              | 33   | 99         | 0                         |
| 994355                 | Non-neutralizer          | 25            | 38             | 95        | 41         | 23            | 27             | 38              | 44              | 22              | 41              | 60              | 41   | 123        | 0                         |
| 184388                 | Non-neutralizer          | 51            | 28             | 72        | 102        | <20           | <20            | 43              | 129             | 78              | 45              | 78              | 69   | 207        | 0                         |
| 376252                 | Non-neutralizer          | <20           | <20            | <20       | <20        | <20           | <20            | <20             | 24              | <20             | 22              | 42              | 35   | 105        | 0                         |
| 474723                 | Non-neutralizer          | 48            | <20            | 74        | 38         | <20           | <20            | 30              | 78              | 66              | 28              | 54              | 58   | 174        | 0                         |
| 186089                 | Non-neutralizer          | <20           | <20            | <20       | <20        | <20           | <20            | <20             | <20             | <20             | <20             | <20             | <20  | <60        | 0                         |
| 211774                 | Non-neutralizer          | <20           | <20            | <20       | <20        | <20           | <20            | <20             | <20             | <20             | <20             | <20             | <20  | <60        | 0                         |
| 913554                 | Non-neutralizer          | <20           | <20            | <20       | <20        | <20           | <20            | <20             | <20             | <20             | <20             | 31              | 29   | 87         | 0                         |
| 135137                 | Non-neutralizer          | 98            | 44             | 28        | 56         | 74            | 54             | 45              | 65              | 47              | <20             | 49              | 46   | 138        | 0                         |
| 527129                 | Non-neutralizer          | <20           | <20            | <20       | <20        | <20           | <20            | <20             | <20             | <20             | <20             | <20             | <20  | <60        | 0                         |
| 609736                 | Non-neutralizer          | 100           | 35             | <20       | <20        | <20           | 38             | 68              | 108             | 135             | <20             | 91              | 59   | 177        | 0                         |
| 344966                 | Non-neutralizer          | 29            | <20            | <20       | <20        | 24            | <20            | 24              | 21              | 33              | <20             | <20             | 30   | 90         | 0                         |
| 533586                 | Non-neutralizer          | <20           | <20            | <20       | <20        | <20           | <20            | <20             | <20             | <20             | <20             | <20             | <20  | <60        | 0                         |

| HIV<br>progressor | Neutralization<br>Status | QH0692<br>.42 | SC422<br>661.8 | PVO<br>.4 | TRO<br>.11 | AC10<br>.0.29 | RHPA<br>4259.7 | THRO4<br>156.18 | REJO4<br>541.67 | TRJO4<br>551.58 | WITO4<br>160.33 | CAAN5<br>342.A2 | MuLV | 3X<br>MuLV | Neutralization<br>breadth |
|-------------------|--------------------------|---------------|----------------|-----------|------------|---------------|----------------|-----------------|-----------------|-----------------|-----------------|-----------------|------|------------|---------------------------|
| 975283            | Neutralizer              | 256           | 1207           | 2728      | 2128       | 482           | 2381           | 282             | 3207            | 914             | 2251            | 829             | 38   | 114        | 11                        |
| 201476            | Neutralizer              | 171           | 234            | 105       | 250        | 141           | 187            | 47              | 165             | 88              | 218             | 123             | 28   | 84         | 10                        |
| 197059            | Neutralizer              | 141           | 66             | 214       | 500        | 238           | 401            | 33              | 385             | 384             | 147             | 249             | 44   | 132        | 9                         |
| 792092            | Neutralizer              | 71            | 100            | 94        | 177        | 305           | 117            | 35              | 558             | 79              | 115             | 288             | 28   | 84         | 8                         |
| 560454            | Neutralizer              | 85            | 34             | 155       | 211        | 262           | 168            | 79              | 1411            | 101             | 4417            | 174             | 40   | 120        | 7                         |
| 705357            | Neutralizer              | 68            | 138            | 135       | 42         | 31            | 111            | 34              | 401             | 84              | 94              | 51              | <20  | <60        | 7                         |
| 729579            | Neutralizer              | 155           | 108            | 129       | 103        | 74            | <20            | 44              | 540             | 75              | 39              | 72              | 34   | 102        | 5                         |
| 995697            | Neutralizer              | 77            | 153            | 218       | 172        | <20           | 108            | 46              | 140             | 35              | 139             | 69              | 37   | 111        | 5                         |
| 273479            | Neutralizer              | 121           | 59             | 134       | 60         | 2400          | 52             | 50              | 911             | 48              | 463             | 180             | 49   | 147        | 4                         |
| 339284            | Neutralizer              | 62            | <20            | <20       | 72         | <20           | 36             | 87              | <20             | 42              | <20             | 64              | <20  | <60        | 4                         |
| 698443            | Neutralizer              | 98            | 31             | 34        | 160        | 45            | <20            | 69              | 129             | 29              | 123             | 63              | 31   | 93         | 4                         |
| 996052            | Neutralizer              | <20           | <20            | 39        | 88         | 247           | 289            | 50              | <20             | <20             | 32              | 147             | <20  | <60        | 4                         |
| 233232            | Neutralizer              | 94            | 76             | 93        | 255        | 54            | 39             | 36              | 280             | 142             | 40              | 86              | 38   | 114        | 3                         |
| 880315            | Neutralizer              | 132           | 89             | 67        | 186        | 53            | 30             | 42              | 159             | 39              | 74              | 91              | 37   | 111        | 3                         |
| 881658            | Neutralizer              | 44            | 28             | 45        | 107        | 39            | 84             | 35              | 82              | 46              | 29              | 147             | 28   | 84         | 3                         |
| 995725            | Neutralizer              | 46            | 35             | 72        | 33         | 550           | 25             | 55              | 906             | <20             | 5942            | 61              | 30   | 90         | 3                         |
| 384682            | Neutralizer              | 86            | <20            | 61        | 41         | 34            | 21             | 65              | 265             | 40              | 184             | 68              | 51   | 153        | 2                         |
| 533621            | Neutralizer              | 85            | 160            | 42        | 159        | <20           | 29             | <20             | <20             | 53              | 46              | <20             | 39   | 117        | 2                         |
| 886861            | Neutralizer              | 51            | <20            | <20       | <20        | 24            | 61             | <20             | <20             | <20             | <20             | 84              | <20  | <60        | 2                         |
| 950005            | Neutralizer              | 66            | 51             | 50        | 98         | 40            | 131            | 47              | 70              | 109             | 33              | 39              | 33   | 99         | 2                         |
| 959154            | Neutralizer              | <20           | <20            | <20       | 95         | 25            | 136            | <20             | <20             | <20             | <20             | 58              | <20  | <60        | 2                         |
| 120083            | Neutralizer              | 75            | 24             | 37        | 82         | 33            | 50             | 55              | 136             | 57              | 185             | 98              | 39   | 117        | 2                         |
| 132848            | Non-neutralizer          | 28            | <20            | <20       | 49         | <20           | <20            | 46              | <20             | 36              | <20             | <20             | 42   | 126        | 0                         |
| 289151            | Non-neutralizer          | <20           | <20            | 33        | <20        | <20           | <20            | <20             | <20             | 37              | 35              | 36              | 20   | 60         | 0                         |
| 339815            | Non-neutralizer          | 28            | <20            | 56        | 46         | <20           | <20            | 36              | 96              | 52              | 32              | 65              | 46   | 138        | 0                         |
| 362517            | Non-neutralizer          | <20           | <20            | 44        | 33         | <20           | <20            | 36              | 55              | 97              | 42              | 105             | 38   | 114        | 0                         |
| 387879            | Non-neutralizer          | 87            | <20            | 36        | 49         | <20           | 163            | 73              | 98              | 43              | 25              | 95              | 56   | 168        | 0                         |
| 867766            | Non-neutralizer          | 39            | <20            | 40        | 49         | 26            | 30             | 36              | 36              | 36              | 25              | 39              | 33   | 99         | 0                         |
| 957078            | Non-neutralizer          | <20           | 22             | 42        | 50         | 24            | 34             | 31              | 27              | 38              | 27              | 35              | 43   | 129        | 0                         |
| 539068            | Non-neutralizer          | 22            | <20            | 30        | 29         | <20           | <20            | 24              | 60              | 46              | <20             | 42              | 30   | 90         | 0                         |
| 181260            | Non-neutralizer          | 34            | <20            | 33        | 24         | <20           | <20            | 40              | 60              | 50              | 21              | 38              | 40   | 120        | 0                         |
| 641287            | Non-neutralizer          | <20           | <20            | <20       | <20        | <20           | <20            | <20             | <20             | <20             | <20             | <20             | <20  | <60        | 0                         |
| 776812            | Non-neutralizer          | 25            | <20            | 51        | 33         | <20           | <20            | 24              | 80              | 20              | 36              | 35              | 27   | 81         | 0                         |
